# Supplementary material for: Excess mortality in India from June 2020 to June 2021 during the COVID pandemic: death registration, health facility deaths, and survey data
Source: bioRxiv or medRxiv preprint supplement (doi:10.1101/2021.07.20.21260872), 2021-07-23

## Supplementary Appendix

Table S1. Input data used to create Table 1

|                                                           | Year / No. of deaths |      |      |        |        |        |         | Pandemic period (months) | Total deaths |
|-----------------------------------------------------------|----------------------|------|------|--------|--------|--------|---------|--------------------------|--------------|
|                                                           | 2015                 | 2016 | 2017 | 2018   | 2019   | 2020   | 2021    |                          |              |
| Andhra Pradesh State (GitHub-DDL, GitHub-local mortality) |                      |      |      |        |        |        |         |                          |              |
| 1                                                         |                      |      |      | 33,637 | 32,302 | 31,989 | 37,963  |                          |              |
| 2                                                         |                      |      |      | 28,788 | 31,170 | 26,802 | 31,920  | Andhra Pradesh           |              |
| 3                                                         |                      |      |      | 27,341 | 27,972 | 25,413 | 33,367  | 1st Wave: Jul-OCT 2020   | 4m 187,675   |
| 4                                                         |                      |      |      | 25,979 | 26,290 | 22,362 | 39,102  | 2nd Wave: Apr-Jun 2021   | 3m 216,439   |
| 5                                                         |                      |      |      | 24,357 | 29,928 | 28,066 | 134,041 |                          |              |
| 6                                                         |                      |      |      | 27,006 | 30,201 | 28,440 | 43,296  |                          |              |
| 7                                                         |                      |      |      | 26,458 | 28,465 | 34,757 |         |                          |              |
| 8                                                         |                      |      |      | 27,929 | 28,667 | 54,940 |         |                          |              |
| 9                                                         |                      |      |      | 26,626 | 30,447 | 55,874 |         |                          |              |
| 10                                                        |                      |      |      | 28,478 | 33,631 | 42,104 |         |                          |              |
| 11                                                        |                      |      |      | 26,785 | 33,201 | 38,665 |         |                          |              |
| 12                                                        |                      |      |      | 29,891 | 31,140 | 39,495 |         |                          |              |
| Assam State (GitHub-local mortality)                      |                      |      |      |        |        |        |         |                          |              |
| 1                                                         |                      |      |      | 12,204 | 15,680 | 18,556 |         | Assam                    |              |
| 2                                                         |                      |      |      | 12,193 | 14,806 | 17,971 |         | 1st Wave: Jul-Oct 2020   | 4m 65,183    |
| 3                                                         |                      |      |      | 12,155 | 14,266 | 16,975 |         | 2nd Wave: Apr-Jun 2021   | 2m NA        |
| 4                                                         |                      |      |      | 11,826 | 13,147 | 9,003  |         |                          |              |
| 5                                                         |                      |      |      | 11,761 | 12,169 | 8,655  |         |                          |              |
| 6                                                         |                      |      |      | 11,656 | 11,303 | 8,305  |         |                          |              |
| 7                                                         |                      |      |      | 11,456 | 11,065 | 9,118  |         |                          |              |
| 8                                                         |                      |      |      | 11,378 | 10,925 | 16,887 |         |                          |              |
| 9                                                         |                      |      |      | 11,593 | 13,177 | 18,364 |         |                          |              |
| 10                                                        |                      |      |      | 11,755 | 14,117 | 20,814 |         |                          |              |
| 11                                                        |                      |      |      | 11,515 | 15,700 | 21,780 |         |                          |              |
| 12                                                        |                      |      |      | 13,113 | 16,702 | 20,657 |         |                          |              |
| Madhya Pradesh State (GitHub-local mortality)             |                      |      |      |        |        |        |         |                          |              |
| 1                                                         |                      |      |      | 34,451 | 39,528 | 41,281 | 44,133  | Madhya Pradesh           |              |
| 2                                                         |                      |      |      | 29,986 | 36,005 | 34,645 | 36,535  | 1st Wave: Jul-Dec 2020   | 6m 259,467   |
| 3                                                         |                      |      |      | 28,504 | 32,911 | 29,747 | 34,667  | 2nd Wave: Mar-May 2021   | 3m 268,040   |
| 4                                                         |                      |      |      | 26,949 | 28,599 | 24,198 | 68,535  |                          |              |
| 5                                                         |                      |      |      | 32,456 | 30,506 | 34,320 | 164,838 |                          |              |
| 6                                                         |                      |      |      | 33,818 | 38,978 | 37,399 |         |                          |              |
| 7                                                         |                      |      |      | 36,523 | 38,922 | 41,303 |         |                          |              |
| 8                                                         |                      |      |      | 38,230 | 44,151 | 40,213 |         |                          |              |
| 9                                                         |                      |      |      | 40,180 | 43,517 | 47,315 |         |                          |              |
| 10                                                        |                      |      |      | 37,766 | 37,953 | 45,208 |         |                          |              |
| 11                                                        |                      |      |      | 30,349 | 39,124 | 40,283 |         |                          |              |
| 12                                                        |                      |      |      | 37,960 | 39,625 | 45,145 |         |                          |              |
| Tamil Nadu State (GitHub-local mortality)                 |                      |      |      |        |        |        |         |                          |              |
| 1                                                         |                      |      |      | 55,390 | 58,405 | 58,132 | 62,273  | Tamil Nadu               |              |
| 2                                                         |                      |      |      | 47,231 | 46,560 | 48,893 | 52,845  | 1st Wave: Jun-Nov 2020   | 6m 358,546   |
| 3                                                         |                      |      |      | 46,703 | 47,772 | 45,987 | 50,959  | 2nd Wave: March-May 2021 | 3m 203,307   |
| 4                                                         |                      |      |      | 43,586 | 45,913 | 41,482 | 58,775  |                          |              |
| 5                                                         |                      |      |      | 43,928 | 51,639 | 50,834 | 93,573  |                          |              |
| 6                                                         |                      |      |      | 43,222 | 48,868 | 50,687 |         |                          |              |
| 7                                                         |                      |      |      | 42,633 | 45,762 | 60,052 |         |                          |              |
| 8                                                         |                      |      |      | 41,051 | 47,385 | 70,033 |         |                          |              |
| 9                                                         |                      |      |      | 40,484 | 48,621 | 65,447 |         |                          |              |
| 10                                                        |                      |      |      | 46,337 | 53,028 | 60,096 |         |                          |              |
| 11                                                        |                      |      |      | 51,602 | 55,658 | 52,231 |         |                          |              |

|                                                                      |       |        |        |           |        |        |           |                   |                   |
|----------------------------------------------------------------------|-------|--------|--------|-----------|--------|--------|-----------|-------------------|-------------------|
| 12                                                                   |       |        | 34,025 | 38,610    | 40,417 |        |           |                   |                   |
| Kerala state (GitHub-DDL)                                            |       |        |        |           |        |        |           |                   |                   |
| 1                                                                    |       | 20,326 | 22,081 | 23,676    | 21,357 | 23,328 |           | Kerala            |                   |
| 2                                                                    |       | 18,128 | 19,354 | 19,892    | 19,714 | 21,152 | 1st Wave: | Aug 2020-Mar      | 8m                |
| 3                                                                    |       | 19,013 | 19,843 | 20,640    | 19,581 | 20,706 | 2nd Wave  | Apr-Jun 2021      | 3m                |
| 4                                                                    |       | 19,014 | 18,825 | 19,983    | 17,212 | 20,229 |           |                   |                   |
| 5                                                                    |       | 20,053 | 19,370 | 20,514    | 17,680 | 27,957 |           |                   |                   |
| 6                                                                    |       | 22,597 | 20,435 | 20,509    | 19,346 | 5,908  |           |                   |                   |
| 7                                                                    |       | 26,302 | 23,372 | 24,567    | 20,963 |        |           |                   |                   |
| 8                                                                    |       | 23,101 | 25,683 | 25,475    | 23,394 |        |           |                   |                   |
| 9                                                                    |       | 21,513 | 22,844 | 24,318    | 22,704 |        |           |                   |                   |
| 10                                                                   |       | 20,681 | 21,075 | 22,005    | 24,949 |        |           |                   |                   |
| 11                                                                   |       | 20,083 | 21,031 | 21,626    | 22,115 |        |           |                   |                   |
| 12                                                                   |       | 21,292 | 21,681 | 20,945    | 23,406 |        |           |                   |                   |
| Gujarat state (Media published Death Certificate issues and CR data) |       |        |        |           |        |        |           |                   |                   |
| 3                                                                    |       |        |        |           |        | 26,026 | 2nd Wave  | Mar-May, 2.3 m    | 2.3m              |
| 4                                                                    |       |        |        | 86,410    |        | 57,796 |           |                   |                   |
| 5*                                                                   |       |        |        | CR Report |        | 40,051 |           | * Up to May 10th  |                   |
| Haryana state                                                        |       |        |        |           |        |        |           |                   |                   |
| 1                                                                    |       |        | 17,818 | 17,638    | 19,066 | 17,858 |           | Haryana           |                   |
| 2                                                                    |       |        | 14,614 | 15,268    | 15,727 | 14,908 | 1st wave  | Jul-Dec 2020      | 6                 |
| 3                                                                    |       |        | 14,567 | 15,316    | 14,787 | 14,908 | 2nd Wave  | Apr-May 2021      | 2                 |
| 4                                                                    |       |        | 13,580 | 13,658    | 12,965 | 28,276 |           |                   |                   |
| 5                                                                    |       |        | 14,335 | 14,630    | 15,445 | 46,108 |           |                   |                   |
| 6                                                                    |       |        | 14,772 | 14,946    | 15,496 |        |           |                   |                   |
| 7                                                                    |       |        | 13,115 | 13,486    | 15,590 |        |           |                   |                   |
| 8                                                                    |       |        | 13,648 | 14,871    | 15,581 |        |           |                   |                   |
| 9                                                                    |       |        | 14,079 | 14,861    | 17,253 |        |           |                   |                   |
| 10                                                                   |       |        | 15,564 | 15,003    | 16,611 |        |           |                   |                   |
| 11                                                                   |       |        | 15,941 | 15,527    | 20,914 |        |           |                   |                   |
| 12                                                                   |       |        | 16,601 | 18,591    | 19,468 |        |           |                   |                   |
| Ahmedabad City (News paper reporting)                                |       |        |        |           |        |        |           |                   |                   |
| 4                                                                    |       |        |        | 2,784     | 3,558  |        | 1st Wave: | Apr-May 2020      | 2m                |
| 5                                                                    |       |        |        | 2,706     | 7,150  |        |           |                   |                   |
| Bangalore (Urban) (GitHub-DDL)                                       |       |        |        |           |        |        |           |                   |                   |
| 1                                                                    |       |        |        | 5,168     | 5,983  | 6,012  |           | Bangalore (Urban) |                   |
| 2                                                                    |       |        |        | 5,766     | 5,454  | 5,538  | 1st Wave: | Jul-Dec 2020      | 6m                |
| 3                                                                    |       |        |        | 5,400     | 4,716  | 6,216  | 2nd Wave  | Apr-May 2021      | 2m                |
| 4                                                                    |       |        |        | 4,806     | 3,327  | 6,249  |           |                   |                   |
| 5                                                                    |       |        |        | 5,899     | 4,469  | 16,249 |           |                   |                   |
| 6                                                                    |       |        |        | 4,687     | 4,881  |        |           |                   |                   |
| 7                                                                    |       |        |        | 5,278     | 6,477  |        |           |                   |                   |
| 8                                                                    |       |        |        | 5,481     | 9,340  |        |           |                   |                   |
| 9                                                                    |       |        |        | 5,411     | 8,710  |        |           |                   |                   |
| 10                                                                   |       |        |        | 5,597     | 8,413  |        |           |                   |                   |
| 11                                                                   |       |        |        | 5,982     | 7,342  |        |           |                   |                   |
| 12                                                                   |       |        |        | 5,544     | 6,329  |        |           |                   |                   |
| Chennai City (GitHub-local mortality)                                |       |        |        |           |        |        |           |                   |                   |
| 1                                                                    | 5,543 | 5,644  | 5,833  | 5,837     | 6,228  | 5,915  | 6,195     | Chennai City      |                   |
| 2                                                                    | 4,753 | 4,528  | 4,877  | 5,132     | 5,114  | 5,046  | 5,218     | 1st wave          | Jun-Dec 2020 (6m) |
| 3                                                                    | 4,959 | 4,633  | 4,925  | 5,107     | 5,286  | 4,961  | 6,038     | 2nd wave          | Mar-Apr 2021      |
| 4                                                                    | 4,505 | 4,611  | 4,735  | 4,772     | 4,964  | 4,149  | 11,876    |                   |                   |
| 5                                                                    | 5,072 | 5,102  | 8,142  | 5,214     | 5,758  | 6,650  | 5,815     |                   |                   |
| 6                                                                    | 4,698 | 4,690  | 4,890  | 5,065     | 6,071  | 7,747  | -         |                   |                   |
| 7                                                                    | 4,499 | 4,717  | 5,156  | 5,003     | 5,121  | 6,368  | -         |                   |                   |

|                                       |       |       |       |       |       |        |           |           |                   |    |        |
|---------------------------------------|-------|-------|-------|-------|-------|--------|-----------|-----------|-------------------|----|--------|
| 8                                     | 4,484 | 4,712 | 5,259 | 4,814 | 5,351 | 6,805  | -         |           |                   |    |        |
| 9                                     | 4,460 | 4,609 | 5,728 | 4,828 | 5,457 | 7,087  | -         |           |                   |    |        |
| 10                                    | 5,019 | 4,572 | 5,603 | 5,762 | 6,147 | 6,714  | -         |           |                   |    |        |
| 11                                    | 6,064 | 4,756 | 5,470 | 5,770 | 5,978 | 6,115  | -         |           |                   |    |        |
| 12                                    | 5,842 | 4,610 | 4,691 | 4,802 | 4,885 | 6,440  | -         |           |                   |    |        |
| Hyderabad (GitHub-local mortality)    |       |       |       |       |       |        |           |           |                   |    |        |
| 1                                     |       | 4,033 | 4,455 | 4,841 | 5,470 | 5,763  | 5,879     |           | Hyderabad City    |    |        |
| 2                                     |       | 3,319 | 3,613 | 4,354 | 4,628 | 5,199  | 4,749     | 1st Wave: | Jun-Dec 2020      | 7m | 50,337 |
| 3                                     |       | 3,664 | 4,035 | 4,277 | 4,851 | 4,894  | 5,090     | 2nd Wave  | Apr-May 2021      | 2m | 20,323 |
| 4                                     |       | 3,979 | 4,016 | 4,002 | 4,708 | 3,967  | 9,465     |           |                   |    |        |
| 5                                     |       | 3,844 | 4,526 | 4,222 | 6,000 | 5,061  | 10,858    |           |                   |    |        |
| 6                                     |       | 3,567 | 3,669 | 3,746 | 4,707 | 7,011  |           |           |                   |    |        |
| 7                                     |       | 4,152 | 3,954 | 4,103 | 4,808 | 10,423 |           |           |                   |    |        |
| 8                                     |       | 4,525 | 4,220 | 4,271 | 5,620 | 7,974  |           |           |                   |    |        |
| 9                                     |       | 3,961 | 4,525 | 4,615 | 6,048 | 7,013  |           |           |                   |    |        |
| 10                                    |       | 4,255 | 4,650 | 4,925 | 6,117 | 6,212  |           |           |                   |    |        |
| 11                                    |       | 4,087 | 4,427 | 4,700 | 5,466 | 5,708  |           |           |                   |    |        |
| 12                                    |       | 4,121 | 4,603 | 4,952 | 5,689 | 5,996  |           |           |                   |    |        |
| Kolkata City (GitHub-local mortality) |       |       |       |       |       |        |           |           |                   |    |        |
| 1                                     | 6,441 | 6,598 | 7,103 | 8,506 | 7,918 | 7,587  | 6,293     |           | Kolkata City      |    |        |
| 2                                     | 5,598 | 4,889 | 5,646 | 5,934 | 6,421 | 6,115  | 4,776     | 1st wave  | Jul-Dec 2020 (6m) | 6m | 40,482 |
| 3                                     | 5,279 | 4,923 | 5,434 | 5,346 | 6,078 | 5,377  | 4,374     | 2nd wave  | Mar-Apr 2021      | 2m | 14,630 |
| 4                                     | 4,582 | 4,978 | 5,246 | 4,861 | 5,128 | 4,830  | 10,256.29 |           |                   |    |        |
| 5                                     | 4,890 | 4,669 | 5,476 | 4,904 | 5,314 | 5,375  | 6,615.86  |           |                   |    |        |
| 6                                     | 4,421 | 4,783 | 4,730 | 5,066 | 5,395 | 5,007  | -         |           |                   |    |        |
| 7                                     | 4,754 | 5,391 | 5,549 | 4,915 | 5,329 | 6,590  | -         |           |                   |    |        |
| 8                                     | 5,274 | 5,610 | 6,275 | 5,532 | 5,056 | 6,521  | -         |           |                   |    |        |
| 9                                     | 5,389 | 5,257 | 5,704 | 5,612 | 5,092 | 6,050  | -         |           |                   |    |        |
| 10                                    | 5,194 | 5,619 | 5,905 | 5,804 | 5,836 | 6,986  | -         |           |                   |    |        |
| 11                                    | 5,170 | 5,924 | 6,337 | 5,685 | 5,805 | 7,238  | -         |           |                   |    |        |
| 12                                    | 5,739 | 5,665 | 5,747 | 6,012 | 5,502 | 7,096  | -         |           |                   |    |        |
| Nagpur City (GitHub-local mortality)  |       |       |       |       |       |        |           |           |                   |    |        |
| 3                                     |       |       |       |       |       | 1,415  | 3,168     |           |                   |    |        |
| 4                                     |       |       |       |       | 1,583 | 1,311  |           |           | Nagpur            |    |        |
| 5                                     |       |       |       |       | 1,900 | 1,624  |           | 1st wave  | July-Dec2020      | 6m | 15,935 |
| 6                                     |       |       |       |       | 1,678 | 1,512  |           | 2nd Wave  | Mar-May 2021      | 3m |        |
| 7                                     |       |       |       |       | 1,590 | 1,808  |           |           |                   |    |        |
| 8                                     |       |       |       |       | 1,787 | 3,385  |           |           |                   |    |        |
| 9                                     |       |       |       |       | 1,958 | 4,096  |           |           |                   |    |        |
| 10                                    |       |       |       |       | 1,801 | 2,387  |           |           |                   |    |        |
| 11                                    |       |       |       |       | 1,775 | 2,325  |           |           |                   |    |        |
| 12                                    |       |       |       |       | 2,166 | 1,934  |           |           |                   |    |        |
| Mumbai City (GitHub-local mortality)  |       |       |       |       |       |        |           |           |                   |    |        |
| 1                                     |       |       | 8,004 | 8,306 | 8,324 | 8,397  | 7,732     |           | Mumbai city       |    |        |
| 2                                     |       |       | 7,158 | 7,305 | 7,797 | 7,116  | 7,131     | 1st wave  | May-Nov2020       | 7m | 74,811 |
| 3                                     |       |       | 7,810 | 7,436 | 7,155 | 5,703  | 8,302     | 2nd Wave  | Mar-June 2021     | 4m | 30,300 |
| 4                                     |       |       | 6,234 | 6,719 | 6,752 | 5,537  | 14,484    |           |                   |    |        |
| 5                                     |       |       | 6,960 | 7,407 | 7,335 | 9,161  | 7,514     |           |                   |    |        |
| 6                                     |       |       | 7,068 | 6,874 | 6,732 | 15,756 |           |           |                   |    |        |
| 7                                     |       |       | 7,675 | 7,336 | 7,931 | 11,770 |           |           |                   |    |        |
| 8                                     |       |       | 7,247 | 7,372 | 8,164 | 10,215 |           |           |                   |    |        |
| 9                                     |       |       | 8,250 | 7,231 | 7,953 | 10,061 |           |           |                   |    |        |
| 10                                    |       |       | 7,700 | 8,755 | 7,390 | 9,835  |           |           |                   |    |        |
| 11                                    |       |       | 7,943 | 7,235 | 8,320 | 8,013  |           |           |                   |    |        |
| 12                                    |       |       | 6,988 | 6,876 | 7,370 | 7,834  |           |           |                   |    |        |

| National (HMIS, Ministry of Health and Family Welfare, GoI) |   |           |           |           |           |           |                 |    |           |
|-------------------------------------------------------------|---|-----------|-----------|-----------|-----------|-----------|-----------------|----|-----------|
| 1                                                           |   | 221,543   | 238,079   | 244,345   | 234,907   |           | National (HMIS) |    |           |
| 2                                                           |   | 204,119   | 209,475   | 211,623   | 212,211   | 1st wave  | Jul-Dec 2020    | 6m | 1,474,997 |
| 3                                                           |   | 192,123   | 198,159   | 183,436   | 203,316   | 2nd Wave  | Apr-May 2021    | 2m | 825,074   |
| 4                                                           |   | 167,999   | 186,274   | 164,831   | 311,688   |           |                 |    |           |
| 5                                                           |   | 188,632   | 206,479   | 186,395   | 513,386   |           |                 |    |           |
| 6                                                           |   | 191,197   | 211,723   | 191,544   |           |           |                 |    |           |
| 7                                                           |   | 191,412   | 207,594   | 212,556   |           |           |                 |    |           |
| 8                                                           |   | 197,917   | 226,277   | 250,096   |           |           |                 |    |           |
| 9                                                           |   | 210,200   | 232,270   | 270,371   |           |           |                 |    |           |
| 10                                                          |   | 214,351   | 224,700   | 246,526   |           |           |                 |    |           |
| 11                                                          |   | 213,179   | 225,872   | 247,578   |           |           |                 |    |           |
| 12                                                          |   | 215,885   | 230,308   | 247,870   |           |           |                 |    |           |
|                                                             |   | 2,408,557 | 2,597,210 | 2,657,171 | 1,475,508 |           |                 |    |           |
| Uttar Pradesh state (GitHub-DDL)                            |   |           |           |           |           |           |                 |    |           |
| 1                                                           | . | .         | 68,962    | 75,773    | 103,048   |           | Uttar Pradesh   |    |           |
| 2                                                           | . | .         | 69,809    | 50,576    | 98,047    | 1st Wave: | Jul-Dec 2020    | 6m | 510,175   |
| 3                                                           | . | .         | 63,962    | 41,683    | 70,797    | 2nd Wave  | Apr-21          | 1m | 61,986    |
| 4                                                           | . | .         | 56,583    | 20,715    | 61,986    |           |                 |    |           |
| 5                                                           | . | .         | 55,338    | 33,543    | .         |           |                 |    |           |
| 6                                                           | . | .         | 62,657    | 59,020    | .         |           |                 |    |           |
| 7                                                           | . | .         | 63,604    | 68,382    | .         |           |                 |    |           |
| 8                                                           | . | .         | 67,811    | 78,658    | .         |           |                 |    |           |
| 9                                                           | . | .         | 69,589    | 92,947    | .         |           |                 |    |           |
| 10                                                          | . | .         | 60,004    | 90,023    | .         |           |                 |    |           |
| 11                                                          | . | .         | 66,740    | 80,981    | .         |           |                 |    |           |
| 12                                                          | . | .         | 66,324    | 99,184    | .         |           |                 |    |           |
| Bihar state (GitHub-DDL)                                    |   |           |           |           |           |           |                 |    |           |
| 1                                                           | . | 7,289     | 28,975    | 38,238    | 45,515    |           | Bihar           |    |           |
| 2                                                           | . | 7,872     | 27,620    | 34,015    | 38,981    | 1st Wave: | Jul-Dec 2020    | 6m | 216,080   |
| 3                                                           | . | 8,196     | 28,452    | 26,682    | 29,774    | 2nd Wave  | Apr-May 2021    | 2m | 101,476   |
| 4                                                           | . | 9,635     | 23,537    | 16,865    | 33,159    |           |                 |    |           |
| 5                                                           | . | 12,495    | 24,640    | 22,893    | 68,317    |           |                 |    |           |
| 6                                                           | . | 13,898    | 30,440    | 32,656    | .         |           |                 |    |           |
| 7                                                           | . | 15,926    | 31,533    | 30,534    | .         |           |                 |    |           |
| 8                                                           | . | 17,933    | 34,326    | 36,355    | .         |           |                 |    |           |
| 9                                                           | . | 20,480    | 27,897    | 39,124    | .         |           |                 |    |           |
| 10                                                          | . | 22,413    | 29,168    | 31,860    | .         |           |                 |    |           |
| 11                                                          | . | 22,317    | 32,088    | 30,299    | .         |           |                 |    |           |
| 12                                                          | . | 24,467    | 32,598    | 47,908    | .         |           |                 |    |           |
| Rajasthan (GitHub-DDL)                                      |   |           |           |           |           |           |                 |    |           |
| 1                                                           |   | 20,798    | 20,239    | 21,954    | 19,622    |           | Rajasthan       |    |           |
| 2                                                           |   | 18,301    | 18,089    | 18,056    | 14,860    | 1st wave  | Jul-Dec 2020    | 6m | 117,039   |
| 3                                                           |   | 18,921    | 17,784    | 16,378    | 16,084    | 2nd Wave  | Apr-May 2021    | 2m | 75,295    |
| 4                                                           |   | 18,018    | 16,651    | 17,596    | 26,251    |           |                 |    |           |
| 5                                                           |   | 19,446    | 17,603    | 20,582    | 49,044    |           |                 |    |           |
| 6                                                           |   | 17,048    | 19,766    | 17,959    |           |           |                 |    |           |
| 7                                                           |   | 15,640    | 15,656    | 17,151    |           |           |                 |    |           |
| 8                                                           |   | 16,023    | 17,569    | 17,918    |           |           |                 |    |           |
| 9                                                           |   | 15,812    | 19,291    | 18,719    |           |           |                 |    |           |
| 10                                                          |   | 17,226    | 17,924    | 18,405    |           |           |                 |    |           |
| 11                                                          |   | 17,489    | 17,794    | 21,265    |           |           |                 |    |           |
| 12                                                          |   | 21,648    | 21,448    | 23,581    |           |           |                 |    |           |

**Table S2 – Comparison of Cvoter sample characteristics with 2011 Indian Census data or National Sample Survey**

| Characteristics     | Census<br>2011 | Valid Sample<br>Percent | Deviation |
|---------------------|----------------|-------------------------|-----------|
| <b>Population</b>   |                |                         |           |
| Andhra Pradesh      | 4.3            | 4.3                     | 0         |
| Assam               | 2.3            | 2.3                     | 0         |
| Bihar               | 7.6            | 7.6                     | 0         |
| Chhattisgarh        | 2.2            | 2.1                     | 0.1       |
| Delhi               | 1.5            | 1.5                     | 0         |
| Goa                 | 0.1            | 0.1                     | 0         |
| Gujarat             | 4.9            | 0                       |           |
| Haryana             | 1.9            | 1.9                     | 0         |
| Himachal Pradesh    | 0.6            | 0.6                     | 0         |
| Jammu & Kashmir     | 0.9            | 0.9                     | 0         |
| Jharkhand           | 2.4            | 2.4                     | 0         |
| Karnataka           | 5.5            | 5.5                     | 0         |
| Kerala              | 2.9            | 2.9                     | 0         |
| Madhya Pradesh      | 5.7            | 5.7                     | 0         |
| Maharashtra         | 9.8            | 9.8                     | 0         |
| NE                  | 1.1            | 1.1                     | 0         |
| Orissa              | 3.5            | 3.5                     | 0         |
| Punjab              | 2.4            | 2.4                     | 0         |
| Rajasthan           | 5.2            | 5.2                     | 0         |
| Tamil Nadu          | 6.6            | 6.6                     | 0         |
| UT                  | 0.3            | 0.3                     | 0         |
| Uttar Pradesh       | 16.5           | 16.5                    | 0         |
| Uttarakhand         | 0.8            | 0.8                     | 0         |
| West Bengal         | 7.7            | 7.7                     | 0         |
| Telangana           | 3.3            | 3.3                     | 0         |
| Total All India     | 100            | 100                     |           |
| <b>Gender</b>       |                |                         |           |
| Male                | 52             | 52                      | 0         |
| Female              | 48             | 48                      | 0         |
| Total               | 100            |                         |           |
| <b>Age Group</b>    |                |                         |           |
| Fresher(Below-25)   | 21.7           | 21.8                    | -0.1      |
| Young(25-45)        | 47.1           | 47.1                    | 0         |
| Middle Aged(45-60)  | 18.5           | 18.5                    | 0         |
| Old(60 and above)   | 12.7           | 12.6                    | 0.1       |
| Total               | 100            | 100                     |           |
| <b>Education</b>    |                |                         |           |
| Lower Education     | 67             | 67                      | 0         |
| Middle Education    | 20             | 20                      | 0         |
| Higher Education    | 13             | 13                      | 0         |
| Total               | 100            | 100                     |           |
| <b>Income</b>       |                |                         |           |
| Lower Income Group  | 50             | 50.1                    | -0.1      |
| Middle Income Group | 35             | 35                      | 0         |
| Higher Income Group | 15             | 14.9                    | 0.1       |
| Total               | 100            | 100                     |           |
| <b>Social Group</b> |                |                         |           |

|                              |      |      |      |
|------------------------------|------|------|------|
| UCH (Upper Caste Hindus)     | 23.7 | 23.8 | -0.1 |
| SC (Scheduled Caste/Dalit)   | 16.2 | 16.2 | 0    |
| OBC (Other Backward Classes) | 32   | 32.1 | -0.1 |
| ST (Scheduled Tribes)        | 8.2  | 8.2  | 0    |
| Muslim                       | 13.7 | 13.7 | 0    |
| Christians                   | 2.3  | 2.3  | 0    |
| Others                       | 1.9  | 1.9  | 0    |
| Sikhs                        | 1.9  | 1.8  | 0.1  |
| Total                        | 100  | 100  |      |
| <b>Location</b>              |      |      |      |
| Urban                        | 30   | 30   | 0    |
| Rural                        | 70   | 70   | 0    |
| Total                        | 100  | 100  |      |

---

**Table S3: SRS and estimated CGHR-UN death rates in major Indian states**

| India & bigger States | Death rate/1000 |      |        |                            |                        |
|-----------------------|-----------------|------|--------|----------------------------|------------------------|
|                       | CGHR-UN 2019    |      |        | CGHR-UN 2018<br>both sexes | SRS 2018<br>both sexes |
|                       | Both Sexes      | Male | Female |                            |                        |
| India                 | 7.3             | 7.6  | 7.0    | 7.3                        | 6.2                    |
| Assam                 | 5.9             | 6.1  | 5.7    | 6.0                        | 6.4                    |
| Jammu & Kashmir       | 4.5             | 5.2  | 3.8    | 4.6                        | 4.9                    |
| Punjab                | 6.4             | 6.7  | 6.0    | 6.4                        | 6.6                    |
| Himachal Pradesh      | 6.3             | 7.2  | 5.3    | 6.3                        | 6.9                    |
| Odisha                | 7.5             | 8.3  | 6.8    | 7.6                        | 7.3                    |
| Chhattisgarh          | 8.4             | 9.1  | 7.7    | 8.4                        | 8.0                    |
| Bihar                 | 6.2             | 5.8  | 6.6    | 6.2                        | 5.8                    |
| Jharkhand             | 5.8             | 5.6  | 6.1    | 5.9                        | 5.4                    |
| Gujarat               | 6.4             | 7.0  | 5.8    | 6.4                        | 5.9                    |
| Kerala                | 7.9             | 8.8  | 7.1    | 7.7                        | 6.9                    |
| Tamil Nadu            | 7.5             | 8.3  | 6.7    | 7.5                        | 6.5                    |
| Andhra Pradesh        | 7.8             | 7.9  | 7.7    | 7.8                        | 6.7                    |
| West Bengal           | 6.7             | 6.7  | 6.6    | 6.6                        | 5.6                    |
| Haryana               | 7.1             | 7.6  | 6.5    | 7.1                        | 5.9                    |
| Rajasthan             | 7.4             | 8.4  | 6.3    | 7.2                        | 5.9                    |
| Uttar Pradesh         | 8.3             | 8.5  | 8.0    | 8.2                        | 6.6                    |
| Maharashtra           | 6.9             | 6.8  | 7.1    | 6.9                        | 5.5                    |
| Madhya Pradesh        | 8.4             | 9.1  | 7.8    | 8.4                        | 6.7                    |
| Delhi                 | 4.2             | 4.7  | 3.7    | 4.3                        | 3.3                    |
| Karnataka             | 9.3             | 9.3  | 9.3    | 9.1                        | 6.3                    |
| Uttarakhand           | 9.4             | 9.3  | 9.4    | 9.3                        | 6.2                    |

**Notes**

\* SRS Death rates are as published by Registrar General of India's SRS Statistical Report 2018

\*\* CGHR (Centre for Global Health Research)-UN Death rates were calculated while applying the 2016-18 average death rates to calculate estimated deaths and then adjusting to the United Nations population Division estimated India deaths.

**Table S4: Excess deaths compared to UN baseline rates and completeness of death registration in Indian states**

| Place and population (millions) | Reference period and comparison months (year: pandemic vs pre-pandemic) | Registered/r         | Expected deaths                                  | Excess deaths as % of expected death | RGI reported coverage of death registration | Actual coverage of death registration |
|---------------------------------|-------------------------------------------------------------------------|----------------------|--------------------------------------------------|--------------------------------------|---------------------------------------------|---------------------------------------|
|                                 |                                                                         | During pandemic wave | UN/SRS-based Expected deaths for relevant months |                                      |                                             |                                       |
| <b>States (Wave 1)</b>          |                                                                         |                      |                                                  |                                      |                                             |                                       |
| Andhra Pradesh (52.5)           | Jul-Oct, 4 months (2020 vs 2018/19)                                     | 188                  | 137                                              | 37.1%                                | 100%                                        | 84%                                   |
| Assam (35.3)                    | Jul-Oct, 4 months (2020 vs 2018-19)                                     | 65                   | 69                                               |                                      | 74%                                         | 69%                                   |
| Tamil Nadu (82.3)               | Jun-Nov, 6 months (2020 vs 2018-19)                                     | 359                  | 306                                              | 17.2%                                | 100%                                        | 92%                                   |
| Haryana (29.3)                  | Jul-Dec, 6 months (2020 vs 2018-19)                                     | 105                  | 104                                              | 0.9%                                 | 100%                                        | 87%                                   |
| Madhya Pradesh (84.3)           | Jul-Dec, 6 months (2020 vs 2018-19)                                     | 259                  | 352                                              |                                      | 89%                                         | 66%                                   |
| Kerala, (35.3)                  | Aug 2020-Mar 2021, 8 months (2020-21 vs 2019)                           | 182                  | 186                                              |                                      | 100%                                        | 92%                                   |
|                                 | <b>Sub-totals and medians</b>                                           | <b>1,158</b>         | <b>1,155</b>                                     | <b>17.2%</b>                         | <b>85.5%</b>                                | <b>85.5%</b>                          |
| <b>Cities (Wave 1)</b>          |                                                                         |                      |                                                  |                                      |                                             |                                       |
| Ahmedabad, GJ (6.4)             | April-May 2 months (2020 vs 2019)                                       | 11                   | 6,130                                            | 74.7%                                | 100%                                        | 90%                                   |
| Hyderabad, TL (9.7)             | Jun-Dec, 7 month (2020 vs 2016-19)                                      | 50                   | 30,148                                           | 67.0%                                | 97%                                         | 107%                                  |
| Nagpur, MH (4.6)                | July-Dec, 6 months (2020 vs 2019)                                       | 16                   | 12,120                                           | 31.5%                                | 100%                                        | 91%                                   |
| Mumbai, MH (18.4)               | May-No, 7 months (2020 vs 2017-19)                                      | 75                   | 56,560                                           | 32.3%                                | 100%                                        | 94%                                   |
| Bengaluru, KN (8.5)             | Jul-Dec, 6 months (2020 vs 2019)                                        | 47                   | 25,925                                           | 79.8%                                | 100%                                        | 128%                                  |
| Chennai, TN (8.7)               | Jun-Dec, 7 months (2020 vs 2015-19)                                     | 47                   | 34,030                                           | 38.9%                                | 100%                                        | 106%                                  |
| Kolkata, WB (14.1)              | Jul-Dec, 6 months (2020 vs 2015-19)                                     | 40                   | 44,988                                           | 0.0%                                 | 100%                                        | 74%                                   |
|                                 | <b>Sub-totals and medians</b>                                           | <b>286</b>           | <b>209,901</b>                                   | <b>38.9%</b>                         | <b>100.0%</b>                               | <b>93.6%</b>                          |
| <b>States (Wave 2)</b>          |                                                                         |                      |                                                  |                                      |                                             |                                       |
| Madhya Pradesh (84.3)           | Mar-May, 3 months (2021 vs 2018-19)                                     | 268                  | 176,009                                          | 52.3%                                | 89%                                         | 51%                                   |
| Haryana (29.3)                  | April-May, 2 months (2021 vs 2018-19)                                   | 74                   | 34,816                                           | 113.7%                               | 100%                                        | 81%                                   |
| Andhra Pradesh (52.5)           | Apr-Jun, 3 months (2021 vs 2018-19)                                     | 216                  | 102,650                                          | 110.9%                               | 100%                                        | 80%                                   |
| Tamil Nadu (82.3)               | March-May, 3 months (2021 vs 2018-19)                                   | 203                  | 152,965                                          | 32.9%                                | 100%                                        | 91%                                   |
| Gujarat (69.5), DC              | Mar-May, 2.3 months (2021 vs 2020)                                      | 124                  | 85,775                                           | 44.4%                                | 100%                                        | 101%                                  |
| Odisha (46.5)                   | Jan-Jun, 5.6 months (2021 vs 2015-19)                                   | 191                  | 163,535                                          | 16.9%                                | 100%                                        | 95%                                   |
| Kerala, (35.3)                  | Apr-May, 2 months (2021 vs 2019)                                        | 48                   | 46,551                                           | 3.5%                                 | 100%                                        | 84%                                   |
|                                 | <b>Sub-totals and medians</b>                                           | <b>1,125</b>         | <b>762,300</b>                                   | <b>44.4%</b>                         | <b>100.0%</b>                               | <b>84.3%</b>                          |
| <b>Cities (Wave 2)</b>          |                                                                         |                      |                                                  |                                      |                                             |                                       |
| Hyderabad, TL (9.7)             | Apr-May, 2 months (2021 vs 2016-19)                                     | 20                   | 8,614                                            | 135.9%                               | 97%                                         | 102%                                  |
| Bengaluru, KN (8.5)             | Apr-May, 2 months (2021 vs 2019)                                        | 22                   | 8,642                                            | 160.3%                               | 100%                                        | 124%                                  |
| Chennai, TN (8.7)               | Mar-Apr, 2 months (2021 vs 2018-19)                                     | 18                   | 9,723                                            | 84.2%                                | 100%                                        | 100%                                  |
| Mumbai, MH (18.4)               | Mar-May, 3 months (2020 vs 2017-19)                                     | 30                   | 24,240                                           | 25.0%                                | 100%                                        | 88%                                   |
| Kolkata, WB (14.1)              | Mar-Apr, 2 months (2021 vs 2018-19)                                     | 15                   | 14,996                                           | 0.0%                                 | 100%                                        | 69%                                   |
|                                 | <b>Sub-totals and medians</b>                                           | <b>106</b>           | <b>66,214</b>                                    | <b>84.2%</b>                         | <b>100.0%</b>                               | <b>99.8%</b>                          |



**Table S5 - Civil registration uncounted deaths in major Indian states**

| State/union territory        | SRS-UN deaths (0000) | Civil registration death 2017-19 (000) |       |        | Medically certified deaths 2017-18 (000) | % Registered but not medically certified |       | % uncounted deaths at            |                                |                              |
|------------------------------|----------------------|----------------------------------------|-------|--------|------------------------------------------|------------------------------------------|-------|----------------------------------|--------------------------------|------------------------------|
|                              |                      | Rural urban together                   | Urban | Female |                                          | All India                                | Urban | Both sexes at civil registration | Females at Civil registration# | At the medical certification |
| India                        | 10,008.6             | 7,018                                  | 2,983 | 2,846  | 1,355                                    | 80.7                                     | 54.6  | 29.9                             | 59.3                           | 86.5                         |
| Andhra Pradesh/<br>Telangana | 711.5                | 558.7                                  | 231.2 | 223.7  | 106.2                                    | 81.0                                     | 54.1  | 21.5                             | 80.5                           | 85.1                         |
| Assam                        | 207.2                | 148.9                                  | 41.3  | 59.7   | 32.1                                     | 78.5                                     | 22.3  | 28.2                             | 64.5                           | 84.5                         |
| Bihar                        | 756.2                | 278.3                                  | 72.3  | 105.9  | 19.3                                     | 93.1                                     | 73.3  | 63.2                             | 57.6                           | 97.4                         |
| Chhattisgarh                 | 250.5                | 180.3                                  | 65.6  | 75.4   | 33.9                                     | 81.2                                     | 48.3  | 28.0                             | 51.9                           | 86.5                         |
| Delhi                        | 83.1                 | 142.3                                  | 125.6 | 54.6   | 84.8                                     | 40.4                                     | 32.5  |                                  | 34.1                           |                              |
| Gujarat                      | 441.0                | 428.0                                  | 197.7 | 172.5  | 84.4                                     | 80.3                                     | 57.3  | 2.9                              |                                | 80.9                         |
| Haryana                      | 208.9                | 183.2                                  | 82.7  | 67.6   | 30.4                                     | 83.4                                     | 63.2  | 12.3                             | 85.9                           | 85.4                         |
| Jharkhand                    | 220.6                | 112.8                                  | 45.1  | 45.9   | 5.0                                      | 95.5                                     | 88.8  | 48.9                             | 60.4                           | 97.7                         |
| Karnataka                    | 639.0                | 491.3                                  | 218.8 | 192.4  | 147.9                                    | 69.9                                     | 32.4  | 23.1                             | 80.5                           | 76.9                         |
| Kerala                       | 279.3                | 264.1                                  | 98.8  | 118.4  | 29.2                                     | 88.9                                     | 70.4  | 5.4                              | 73.3                           | 89.5                         |
| Madhya Pradesh               | 704.0                | 429.4                                  | 168.8 | 164.0  | 37.4                                     | 91.3                                     | 77.8  | 39.0                             | 53.0                           | 94.7                         |
| Maharashtra                  | 873.4                | 669.6                                  | 393.0 | 282.8  | 207.3                                    | 69.0                                     | 47.3  | 23.3                             | 68.9                           | 76.3                         |
| Odisha                       | 349.1                | 331.5                                  | 86.8  | 141.9  | 39.7                                     | 88.0                                     | 54.3  | 5.0                              | 65.6                           | 88.6                         |
| Punjab                       | 196.9                | 212.9                                  | 100.9 | 87.8   | 34.0                                     | 84.0                                     | 66.3  |                                  | 6.2                            | 82.7                         |
| Rajasthan                    | 582.0                | 439.8                                  | 145.7 | 156.2  | 56.7                                     | 87.1                                     | 61.1  | 24.4                             | 55.5                           | 90.3                         |
| Tamil Nadu                   | 611.9                | 596.1                                  | 300.6 | 241.7  | 248.7                                    | 58.3                                     | 17.3  | 2.6                              |                                | 59.3                         |
| Uttarakhand                  | 107.4                | 49.4                                   | 21.1  | 18.9   | 4.1                                      | 91.6                                     | 80.4  | 54.0                             | 57.5                           | 96.2                         |
| Uttar Pradesh                | 1,865.1              | 807.5                                  | 282.6 | 352.0  | 43.4                                     | 94.6                                     | 84.6  | 56.7                             | 47.6                           | 97.7                         |
| West Bengal                  | 675.9                | 495.1                                  | 218.5 | 205.0  | 47.7                                     | 90.4                                     | 78.2  | 26.8                             | 65.8                           | 92.9                         |
| Jammu & Kashmir              | 66.9                 | 40.3                                   | 14.4  | 17.6   | NA                                       | NA                                       | NA    | 39.8                             | 31.0                           | NA                           |

**Notes:**

1. \*\* - SRS-UN death estimates: SRS death rates applied to United Nations estimated population and then adjusted to UN estimated deaths. SRS death rates are under reported. In most civil registration completed states, registered deaths are closer to these estimated deaths.
2. # - numerator for % un-accounted female deaths at civil registration was the difference of SRS-UN estimated female deaths and the female civil registration deaths. SRS-UN estimated female death not shown in this table.

Sources of data: SRS vital Statistics reports, Medical certification of Causes of Death (MCCD), Vital statistics of India civil registration system, World Population Prospectus (WPP) of United Nations Population Division.

**Figure S1 - Reporting PCR Positive rates in population and undocumented deaths at civil registration in Indian states**

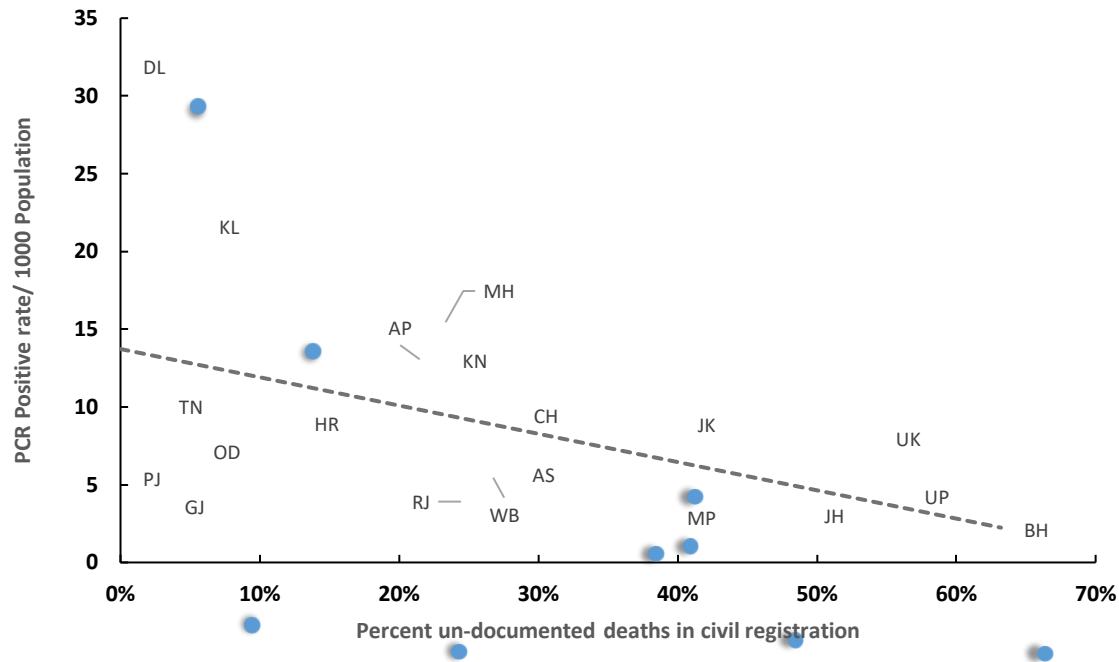

Notes: PCR positive rates for Apr-Dec 2020. Percent un-documented deaths were calculated using the difference between average civil registration deaths for 2017-19 and the expected deaths calculated for each state from SRS death rates adjusted for UN death estimates. The Pearson correlation between PCR positivity rate and the percent un-documented deaths in civil registration was -0.5.

Abbreviations: AP - Andhra Pradesh/Telangana, AS - Assam, BH - Bihar, CH - Chhattisgarh, DL - Delhi, GJ - Gujarat, HR - Haryana, JH - Jharkhand, JK - Jammu & Kashmir, KL - Kerala, KN - Karnataka, MH - Maharashtra, MP - Madhya Pradesh, OD - Odisha, PJ - Punjab, RJ - Rajasthan, TN - Tamil Nadu, UK - Uttarakhand, UP - Uttar Pradesh, WB - West Bengal.

**Figure S2 – Un-counted at civil registration and non-medically certified deaths in India 2019.** Out of the 10 million annual deaths in India, 3 million deaths are un-accounted at civil registration and 8.5 million are not medically certified

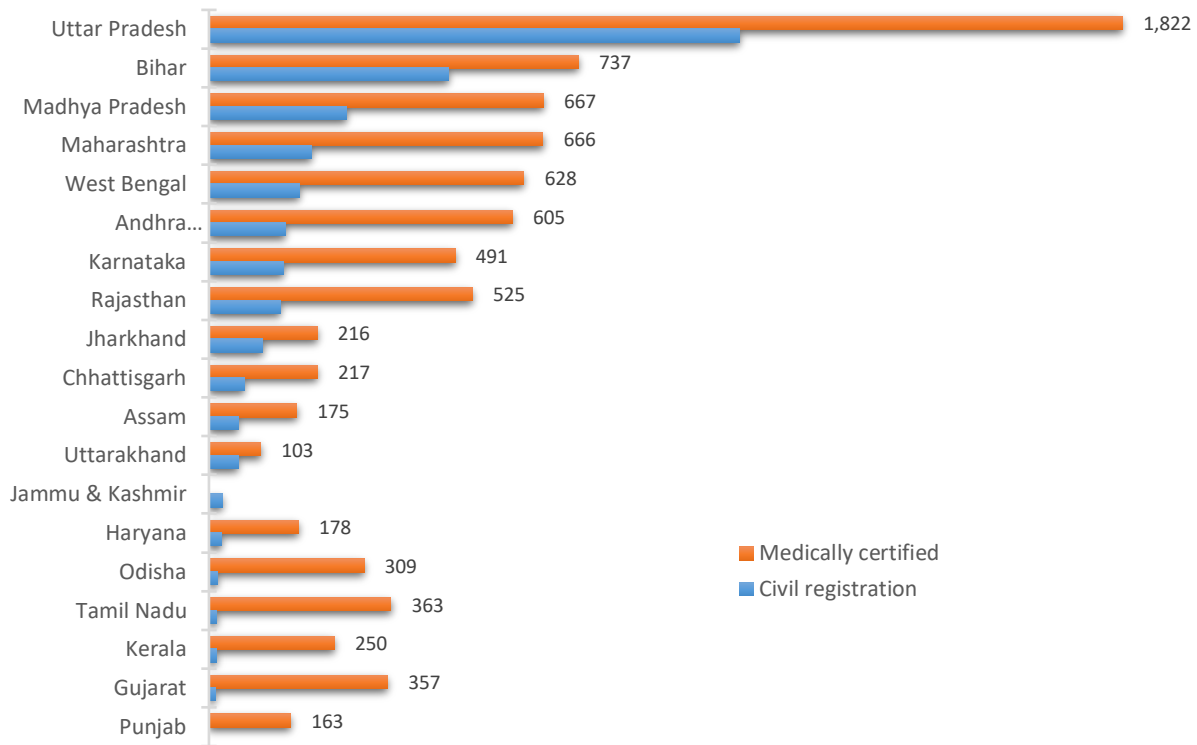

Supplement: Supplementary file [file media-1.pdf]
